# Supplementary material
Source: publisher figshare collection journal article supplement (https://acs.figshare.com/ndownloader/files/28142039)
Supplement: Supplementary file 1 [file 28142039]

**Supporting Information**

**(2 pages, including 3 Figures)**

**Polyvinylidene Fluoride Energy Harvester with Boosting Piezoelectric  
Performance through 3D Printed Biomimetic Bone Structure**

Li Song, Ruixian Dai, Yijun Li\*, Qi Wang, Chuhong Zhang\*

State Key Laboratory of Polymer Materials Engineering, Polymer Research Institute  
of Sichuan University, Chengdu, 610065, China

\* Email of corresponding author: ruddph@gmail.com; chuhong.zhang@scu.edu.cn

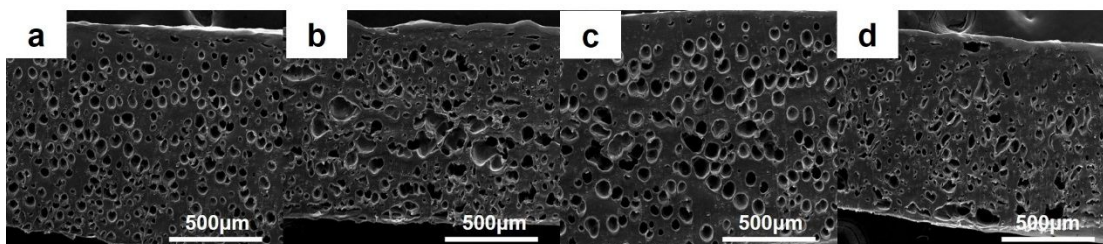

Figure S1. Longitudinal-sectional SEM pictures of parts with ionic liquid content of **a** WF-2.5IL, **b** WF-5IL, **c** WF-7.5IL, **d** WF-10IL after washing.

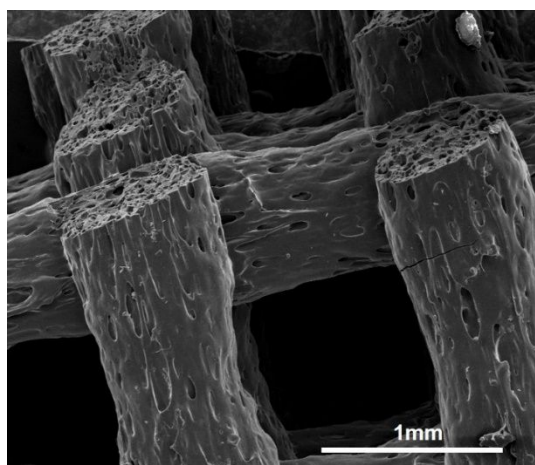

Figure S2. SEM image of pores on the surface of the part.

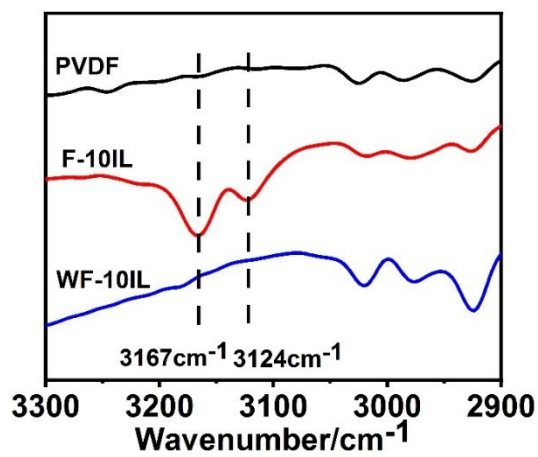

Figure S3. Comparison of FTIR spectra of parts before and after washing.
